# Supplementary material for: Conditional variable importance for random forests
Source: Springer Nature journal article supplement (doi:10.1186/1471-2105-9-307), 2008-07-11

first split

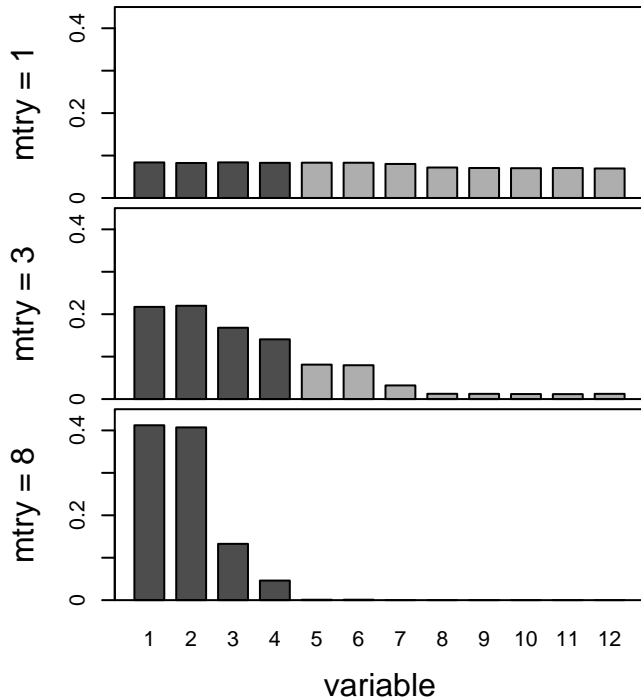

all splits

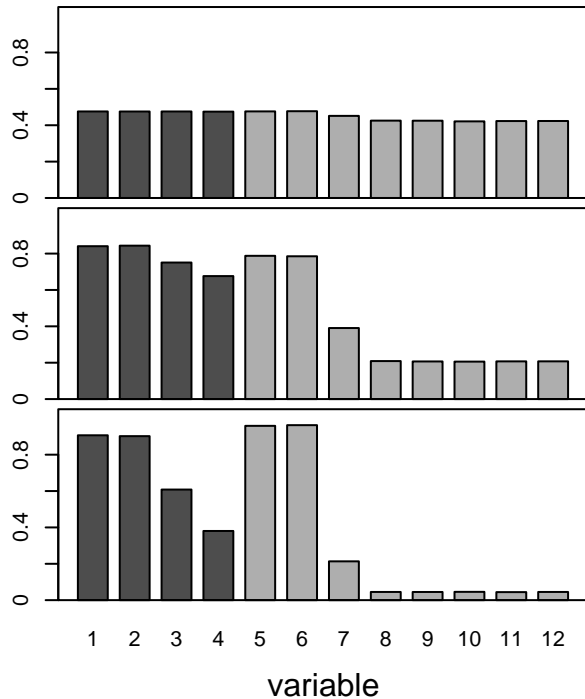

Supplement: 12859_2008_2292_MOESM1_ESM.pdf [file 12859_2008_2292_MOESM1_ESM.pdf]
