# Supplementary material for: Conditional variable importance for random forests
Source: Springer Nature journal article supplement (doi:10.1186/1471-2105-9-307), 2008-07-11
Supplement: 12859_2008_2292_MOESM3_ESM.pdf [file 12859_2008_2292_MOESM3_ESM.pdf]

mtry = 1

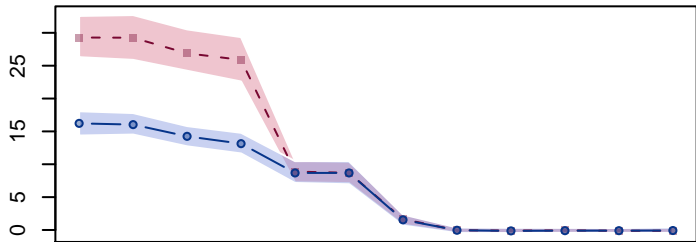

mtry = 3

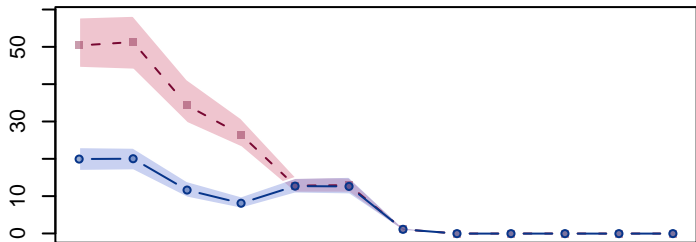

mtry = 8

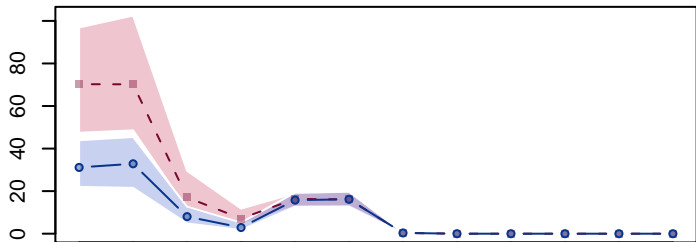

variable
